# Supplementary material
Source: PubMed Central journal article supplement (PMC3421226)
Supplement: 1118622109_pnas.1118622109_SI.pdf [file 1118622109_pnas.1118622109_SI.pdf]

# Supporting Information

Sharp et al. 10.1073/pnas.1118622109

## SI Text

**SI Materials and Methods. Peptide synthesis.** Peptides were synthesized on a 0.1 mmol scale using *O*-(Benzotriazol-1-yl)-*N,N,N',N'*-tetramethyluronium hexafluorophosphate (HBTU) activation on a CEM Liberty synthesizer (CEM Corp.). All standard Fmoc amino acids and reagents were purchased from AGTC Bio-products. Fmoc 4-iodophenylalanine was purchased from GL Biochem. Peptide synthesis grade DMF was purchased from Fisher Scientific. Peptides were prepared using a Wang-Chemmatrix solid support (PCAS Biomatrix), which was either bought preloaded or was loaded using a DIC/HOBt/DMAP method recommended by the manufacturer. Crude peptides were cleaved from the solid support by treatment with a 95:2.5:2.5 mix of TFA:water:triisopropylsilane (10 mL) for 2 h at room temperature, followed by an additional wash of the resin with neat TFA (10 mL). The combined TFA extracts were reduced in volume to *ca.* 5 mL under a gentle flow of nitrogen prior to the addition of cold diethyl ether (*ca.* 45 mL). The resultant precipitate was isolated by centrifugation and then dissolved in 1:1 water:acetonitrile and freeze-dried to give the crude peptide as a fluffy white solid. Crude peptides were purified by reverse-phase HPLC using a Kromatek Hi-Q Sil semipreparative C18 column running a linear gradient of water and acetonitrile buffers, each containing 0.1% TFA. Gradients were typically runs from 20% to 60% acetonitrile over 30 min. Pure column fractions were identified by MALDI-TOF mass spectrometry, using an Applied Biosystems 4700 Series Proteomics Analyzer instrument. Pure fractions were combined and freeze-dried, with the purity of the resultant material being checked by analytical HPLC. Concentration of peptides were determined by UV-visible spectroscopy, with molar extinction coefficients of  $\epsilon_{274}(\text{Tyr}) = 1420 \text{ M}^{-1} \text{ cm}^{-1}$  and  $\epsilon_{280}(p\text{-iodo-phenylalanine}) = 260 \text{ M}^{-1} \text{ cm}^{-1}$ . The sequences of the peptides can be found in Table S2.

**X-ray crystal structure determination.** Freeze-dried peptides were resuspended directly into deionized water and concentrated to 10 mg/mL for vapor-diffusion crystallization trials using standard commercial screens at 18 °C with 0.2  $\mu\text{L}$  peptide equilibrated with 0.2  $\mu\text{L}$  of reservoir solution. The crystallization conditions were 0.2 M zinc acetate, 0.1 M sodium acetate, and 10% (wt/vol) PEG 3 K, at pH 4.5. X-ray diffraction data were collected at the Diamond Light Source on station IO4 using radiation of 1.7 Å wavelength. The data were processed with HKL2000 (1). The structure was solved with SHELX (2) by experimental phasing using single anomalous diffraction (SAD) from the iodine atoms. Four clear  $\alpha$ -helices could be identified in the resultant electron density map. The model was automatically built using ARP/wARP (3) and Phenix Autobuild software (4). The final refined structure was obtained by subsequent iterative model building with the program COOT (5), and refinement with REFMAC (6) and PHENIX (7). Translation Libration Screw-motion (TLS) parameters were used in the final rounds of refinement, with one TLS group assigned to each protein chain. The final model includes one ion, identified from the density and coordination as a zinc, and a glycerol molecule, both prevalent components of the crystallization buffer. A summary of the refinement and model-building statistics can be found together with Protein Data Bank (PDB) accession codes in Table S3.

**Model building and fitting.** Coiled coils were modeled using MAKECCSC with a radius of 4.4 Å, a rise per residue ( $t_{\text{res}}$ ) of 1.529 Å, and a  $\varphi_{\text{CB}}$  of 210°, as defined by Offer and Sessions (7). The value for  $t_{\text{res}}$  was chosen so that equivalent residues had the same *x, y* coordinates after each pitch.

The EM density map produced from helical reconstruction was thresholded to enclose the volume of either 100% or 60% of the mass of the protein model. The values were calculated based on the weight of three heterodimers (19,496 Da, corresponding to a single pitch of the coiled coil) multiplied by 1.21 Å<sup>3</sup> Da<sup>-1</sup> (8). Atomic models were fitted into the EM density map as rigid structures. Chimera (University of California, San Francisco) (9) was used first to place manually the model within the EM density map before simulating the PDB model density to 8 Å and optimizing the correlation between the two maps. The fitting routine was repeated until convergence. Different starting orientations were also tried.

**Molecular-dynamics simulation.** One pitch of coiled coil was modeled as a sticky-ended repeat unit, derived from the 3<sub>1</sub> helix above, containing three copies of each peptide. Intracoiled-coil side-chain conformations were set to those of the blunt-ended crystal structure. Intercoiled-coil side chains were left in an extended conformation at this stage. A hexagonal 1 by 3 by 3 repeating cell of these repeat units was generated. Minimal alterations to the intercoiled-coil side-chain torsions were made, by inspection, to remove clashes and maximize Arg:Asp salt bridges. All structural manipulations were performed using InsightII (2005; Accelrys Inc.) and PyMol (available at [www.pymol.org](http://www.pymol.org)). This unit cell was used as the box for an all-atom molecular-dynamics simulation under the AMBER03 force field. The simulation was set up using the GROMACS 4.5.4 suite of tools (available at [www.gromacs.org](http://www.gromacs.org)) with side chains charged consistent with pH 7.4, solvated with 6,170 TIP4P waters and neutralized with chloride ions. The system was subjected to 5,000 steps of steepest descent minimization, followed by 5 ns of position-restrained molecular dynamics as an initial equilibration. Unrestrained molecular dynamics was performed for 120 ns at 278 K under periodic boundary conditions (particle mesh Ewald treatment of long range electrostatics) as an NPT ensemble.

**Cryotransmission electron microscopy (cryo-TEM) and tomography.** Samples were spread on freshly glow-discharged lacey-carbon grids and plunge-frozen in liquid ethane using the Vitrobot (FEI Company). Grids were transferred to a cryoholder (Gatan Inc.) and visualized in a Tecnai T20 electron microscope (FEI Company) at 200 kV accelerating voltage at a nominal magnification of  $\times 50k$ . Low-dose software (FEI Company) was used with an underfocus of 1.5  $\mu\text{m}$  and an electron dose of 10 e/Å<sup>2</sup>. Images were captured on an Eagle 4k by 4k CCD camera (FEI Company) unbinned with a final pixel size of 2.21 Å. The EM was calibrated with a negatively stained catalase crystal and a sample of graphitized carbon. A sample of T4 bacteriophage, with a tail striation of 40.6 Å (10), was incubated with fully formed SAFs for 30 s prior to addition to grids and freezing. For tomography, lacey-carbon grids were incubated with 15 nm colloidal gold (Aurion) on both sides to act as fiducial markers. Samples were plunge-frozen as described above.

1. Otwinowski Z, Minor W (1997) Processing of X-ray diffraction data collected in oscillation mode. *Methods Enzymol* 276:307–326.

2. Sheldrick GM (2008) A short history of SHELX. *Acta Crystallogr Sect A* 64:112–122.

3. Perrakis A, Harkiolaki M, Wilson KS, Lamzin VS (2001) ARP/wARP and molecular replacement. *Acta Crystallogr Sect D-Biol Crystallogr* 57:1445–1450.

4. Adams PD, et al. (2010) PHENIX: A comprehensive Python-based system for macromolecular structure solution. *Acta Crystallogr Sect D-Biol Crystallogr* 66:213–221.
5. Emsley P, Cowtan K (2004) Coot: Model-building tools for molecular graphics. *Acta Crystallogr Sect D-Biol Crystallogr* 60:2126–2132.
6. Murshudov GN, Vagin AA, Dodson EJ (1997) Refinement of macromolecular structures by the maximum-likelihood method. *Acta Crystallogr Sect D-Biol Crystallogr* 53:240–255.

7. Offer G, Sessions R (1995) Computer modeling of the alpha-helical coiled-coil—packing of side-chains in the inner-core. *J Mol Biol* 249:967–987.
8. Harpaz Y, Gerstein M, Chothia C (1994) Volume changes on protein-folding. *Structure* 2:641–649.
9. Goddard TD, Huang CC, Ferrin TE (2007) Visualizing density maps with UCSF Chimera. *J Struct Biol* 157:281–287.
10. Moody MF, Makowski L (1981) X-ray diffraction study of tail-tubes from bacteriophage-T21. *J Mol Biol* 150:217–244.

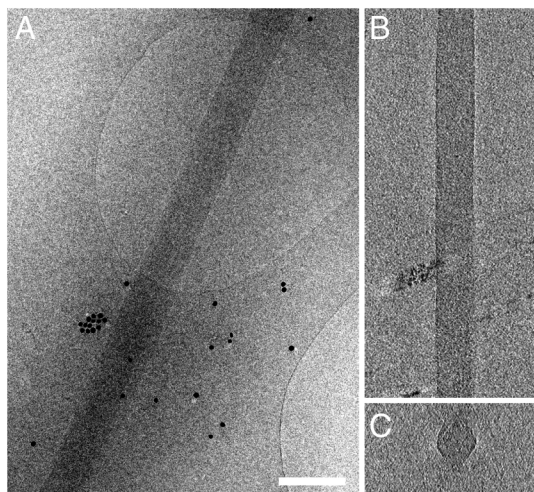

**Fig. S1.** A tomogram of frozen-hydrated self-assembling peptide fibers (SAFs). (A) Image of a SAF used to collect a tomogram from  $\pm 45^\circ$ . The lacey-carbon and gold fiducial markers used to aid reconstruction are clearly visible. (B) Orthogonal slice through the fiber in A, showing the uniform density present in the interior of the fiber. The image is an average of 30 tomographic slices to aid contrast. (C) View along the fiber long-axis showing the approximately circular cross-section of the fiber. Scale bar, 200 nm for all images.

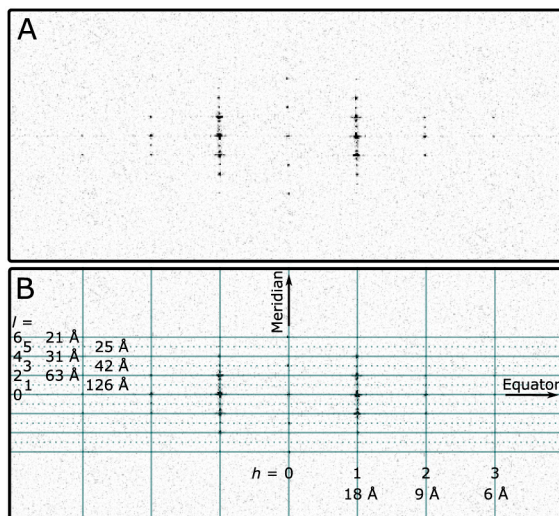

**Fig. S2.** Fourier transform of the [100] longitudinal striations. (A) Background-subtracted Fourier transform of the SAF in Fig. 3 (annotated B) with layer and row lines. The first meridional reflection is the third at 41.8 Å. The layer lines (*l*) extend past the sixth at 20.9 Å, whereas row lines (*h*) extend out to the third at 6 Å.











**Table S2. SAF peptide sequences and registers**

| Peptide       | Sequence |                |                |                |               |
|---------------|----------|----------------|----------------|----------------|---------------|
| Heptad repeat | <i>g</i> | <i>abcdefg</i> | <i>abcdefg</i> | <i>abcdefg</i> | <i>abcdef</i> |
| SAF-p1        | K        | IAALKQK        | IASLKQE        | IDALEYE        | NDALEQ        |
| SAF-p2a       | K        | IRRLKQK        | NARLKQE        | IAALEYE        | IAALEQ        |
| SAF-p1-I      | K        | IAALKQK        | IASLKQE        | IDALE $\phi$ E | NDALEQ        |
| Blunt-p1-I    | E        | IDALE $\phi$ E | NDALEQK        | IAALKQK        | IASLKQ        |

The  $\phi$  in SAF-p1-I represents the *p*-iodo-phenylalanine residue.

**Table S3. X-ray diffraction data collection, phasing, and refinement statistics (SAD) for 3RA3**

| 3RA3                              |                        |
|-----------------------------------|------------------------|
| Data collection                   |                        |
| Space group                       | P 3 <sub>2</sub>       |
| Cell dimensions                   |                        |
| a, b, c (Å)                       | 45.1, 45.1, 67.6       |
| $\alpha, \beta, \gamma$ (°)       | 90.0, 90.0, 120.0      |
| Resolution (Å)                    | 25.0–2.30 (2.38–2.30)* |
| $R_{\text{merge}}$                | 0.102 (0.606)          |
| $I/\sigma I$                      | 21.0 (2.0)             |
| Completeness (%)                  | 99.8 (98.8)            |
| Redundancy                        | 8.2 (5.0)              |
| Refinement                        |                        |
| Resolution (Å)                    | 22.54–2.31             |
| No. reflections #                 | 6767                   |
| $R_{\text{work}}/R_{\text{free}}$ | 0.198/0.247            |
| No. atoms                         |                        |
| Protein                           | 857                    |
| Waters Ligand/ion                 | 286/1                  |
| B-factors                         |                        |
| Protein (main chain/side chains)  | 47.6/56.5              |
| Waters Ligand/ion                 | 52.782.0/67.7          |
| Rmsd                              |                        |
| Bond lengths (Å)                  | 0.007                  |
| Bond angles (°)                   | 0.852                  |

\*Highest-resolution shell is shown in parentheses.

**Table S4. Layer line Bessel orders**

| Layer line | Bessel order |
|------------|--------------|
| 1          | -2           |
| 2          | 2            |
| 3          | 0            |
| 4          | -2           |
| 5          | 2            |
| 6          | 0            |
| 7          | -2           |
| 8          | 2            |
| 9          | 0            |
| 10         | -2           |
| 12         | 0            |

Note: The first layer line at 125.4 Å has  $n = -2$ , describing a left-handed helix.
